# Supplementary material for: Unraveling the significance of the zinc ratio in water-in-salt electrolytes
Source: Royal Society of Chemistry journal article supplement (doi:10.1039/d4ta02704c), 2024-01-01
Supplement: d4ta02704c1.pdf [file d4ta02704c1.pdf]

## Supportive information

### Unraveling the Significance of Zinc Ratio in Water-in-Salt Electrolytes

Fekadu Wubatu Fent and Roza Bouchal\*

Max Planck Institute of Colloids and Interfaces, Am Mühlenberg 1, 14476 Potsdam, Germany.

[Roza.Bouchal@mpikg.mpg.de](mailto:Roza.Bouchal@mpikg.mpg.de)

#### Experimental section

##### Preparation of materials and electrolytes

Zinc foil (100  $\mu\text{m}$  thickness, 99%), titanium foil (100  $\mu\text{m}$  thickness, 99%), and copper foil (10  $\mu\text{m}$  thickness, 99%) were purchased from Goodfellow. Zinc chloride ( $\text{ZnCl}_2$ , 100%) and lithium acetate (LiAc, 99%) were purchased from Sigma-Aldrich and Organics, respectively, and used without any further treatment.  $\text{ZnCl}_2$  salt was stored and weighed inside the glove box. Precalculated amounts of  $\text{ZnCl}_2$  and LiAc salts were put in vials. Water was added to each vial with gradual increments and the mixtures were stirred after each addition till a saturation point was obtained. The vials were kept for 24 hours at room temperature to confirm the dissolution of the salts. The titanium foil was prepared by punching with a 19 mm diameter electrode puncher machine and soaking in diluted 1 M  $\text{HNO}_3$  solution and shaking for around 10 min, followed by rinsing with ultrapure water and acetone three times, respectively, and then drying under vacuum. Similar procedure was followed to prepare Copper foil electrode except it was soaked in 1 M HCl solution. Similarly, zinc-foil was prepared by punching with a 13 mm diameter electrode puncher machine followed by washing with ultrapure water and acetone three times each, and drying under vacuum.

##### Characterizations

Raman spectroscopy of the electrolytes was conducted on a Witec Alpha 300M+ instrument. 532 nm laser was used and operated at a power of 20 mW at the source. The spectra were collected in backscattering geometry in a confocal micro-Raman mode with a 20 $\times$  objective. The solutions

were placed in a small Quartz cuvette of thickness of 2mm. Each spectrum was collected at an integration time of 2 seconds with 20 accumulations with a resolution of approximately  $2\text{ cm}^{-1}$ . The spectra of the water region were fitted using the Gaussian function. To observe the morphology and byproducts on the zinc surface, the immersed and cycled Zn electrodes were washed with water and dried under vacuum. SEM pictures were performed on a LEO 1550 Gemini Zeiss microscope. Powder X-ray Diffraction (PXRD) measurements were performed on a Rigaku Smart Lab diffractometer, using Cu K $\alpha$  radiation at  $1.5406\text{ \AA}$ , with steps of  $0.1^\circ$  and a scanning rate of  $0.5^\circ\text{ min}^{-1}$ . XPS measurements were performed using a Thermo Fisher Scientific K-Alpha, and data were treated with XPSpeak 4.1 software.

### **Electrochemical measurements**

All electrochemical measurements were done using Biologic battery testing instrument at room temperature ( $23 - 24\text{ }^\circ\text{C}$ ) and were tested 2 to 3 times. All the cyclic voltammetry, LSV and cycling stability experiments were performed after the electrolyte was purged with nitrogen gas. The Zn||Zn symmetrical batteries consisting of two Zn electrodes ( $\Phi 13\text{ mm}$ ), a glass fiber separator ( $\Phi 19\text{ mm}$ ), and  $120\text{ }\mu\text{L}$  electrolyte were assembled in a coin cell in the air. The Zn||Ti and Zn||Cu cells for the reversibility test were assembled using Cu/Ti foil ( $\Phi 19\text{ mm}$ ), Zn foil ( $\Phi 13\text{ mm}$ ), and glass fiber separator ( $\Phi 19\text{ mm}$ ) in  $120\text{ mL}$  electrolyte. Galvanostatic charge-discharge cycling tests of Zn||Zn, Zn||Ti, and Zn||Cu cells were performed on a BioLogic instrument. Cyclic voltammetry (CV) dissolution/deposition was performed in a 3-electrode cell using titanium foil as a working electrode, platinum as a counter electrode, and Ag/AgCl as a reference electrode at  $10\text{ mV}^{-\text{s}}$  in a potential window of  $-1.7$  to  $0\text{ V}$ . Chronoamperometry (CA) tests were measured using Zn||Zn symmetric cells under a polarization voltage of  $-150\text{ mV}$  and  $10\text{ mV}$  for  $900\text{ s}$  and  $1800\text{ s}$  to determine the zinc ions transference number and the deposition process, respectively. Linear sweep voltammetry (LSV) curves were conducted using Zn||Ti half cells from OCV to  $-1.7\text{ V}$  at a scan rate of  $10\text{ mV s}^{-1}$  similar to the CV protocols. Nucleation overpotentials were conducted using Zn||Ti cells at a current density of  $1\text{ mA cm}^{-2}$  and capacity of  $0.5\text{ mAh cm}^{-2}$ . The electrochemical impedance spectroscopy (EIS) measurements were performed in the range of  $100\text{ kHz}$  to  $100\text{ mHz}$  at a voltage amplitude of  $10\text{ mV}$ .

The  $Zn^{2+}$  transference number ( $t_{Zn^{2+}}$ ) of the electrolyte was measured using a Zn||Zn symmetric cell via EIS and CA measurements by applying constant polarization voltage. The  $t_{Zn^{2+}}$  was calculated using the Bruce-Vincent-Evans equation as described below: <sup>1, 2</sup>

$$t_{Zn^{2+}} = \frac{I_s (V - I_0 R_0)}{I_0 (V - I_s R_s)}$$

Where  $\Delta V$  is the applied polarization voltage (10 mV) across the cell,  $R_0$  and  $R_s$  represent the interfacial resistances before and after polarization, respectively;  $I_0$  and  $I_s$  are the initial current before the polarization and the stable current after the polarization, respectively.

### Physicochemical properties

The density of the sample at 25°C was determined in a density oscillation tube (DMA 5000M, Anton Paar, Graz). The viscosity at 25°C was measured and evaluated with an Automated Microviscometer (AMVn, Anton Paar, Graz), a capillary with a diameter of 1.6 mm at 70° angle and repeated measurements. Ionic conductivity was tested using the impedance method via Biologic electrochemical testing instrument at 25°C.

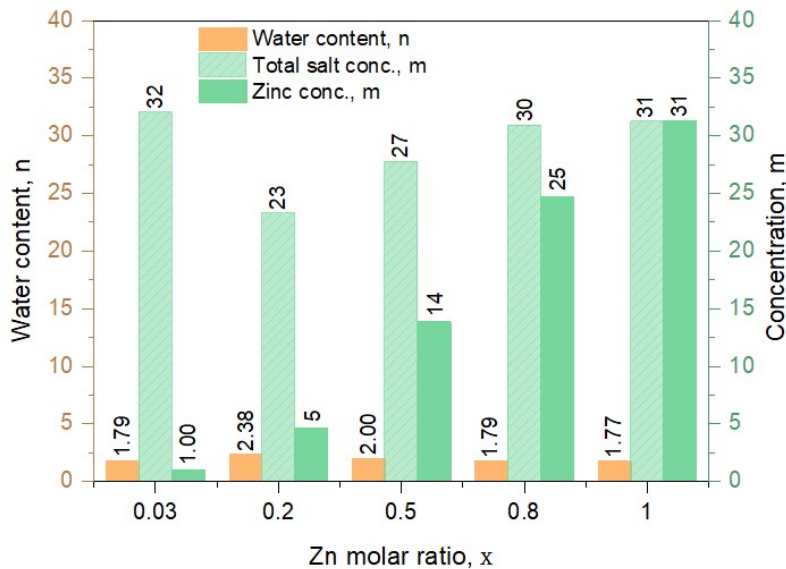

**Figure S1:** Zinc molar ratio versus water content, zinc concentration, and total salt concentration in various WISEs with different  $ZnCl_2$  and LiAc molar ratios.

**Table S1:** Physicochemecal properties of different WISEs having different Zn molar ratios at 25 °C.

| <b>Zinc molar ratio</b>                              | <b>pH</b> | <b>Viscosity<br/>(mPa s)</b> | <b>Conductivity<br/>(mS cm<sup>-1</sup>)</b> | <b>Density<br/>(g cm<sup>-3</sup>)</b> |
|------------------------------------------------------|-----------|------------------------------|----------------------------------------------|----------------------------------------|
| 0.03Zn(Ac) <sub>2</sub> 0.97KAc 1.79H <sub>2</sub> O | 10.9      | 48                           | 29                                           | 1.471                                  |
| 0.2ZnCl <sub>2</sub> 0.8LiAc 2.38H <sub>2</sub> O    | 5.9       | 537                          | 4                                            | 1.366                                  |
| 0.5ZnCl <sub>2</sub> 0.5LiAc 2.00H <sub>2</sub> O    | 2.3       | 265                          | 8                                            | 1.629                                  |
| 0.8ZnCl <sub>2</sub> 0.2LiAc 1.79H <sub>2</sub> O    | -0.9      | 317                          | 5                                            | 1.951                                  |
| 1ZnCl <sub>2</sub> 1.778H <sub>2</sub> O             | <-2       | 467                          | 6                                            | 2.188                                  |

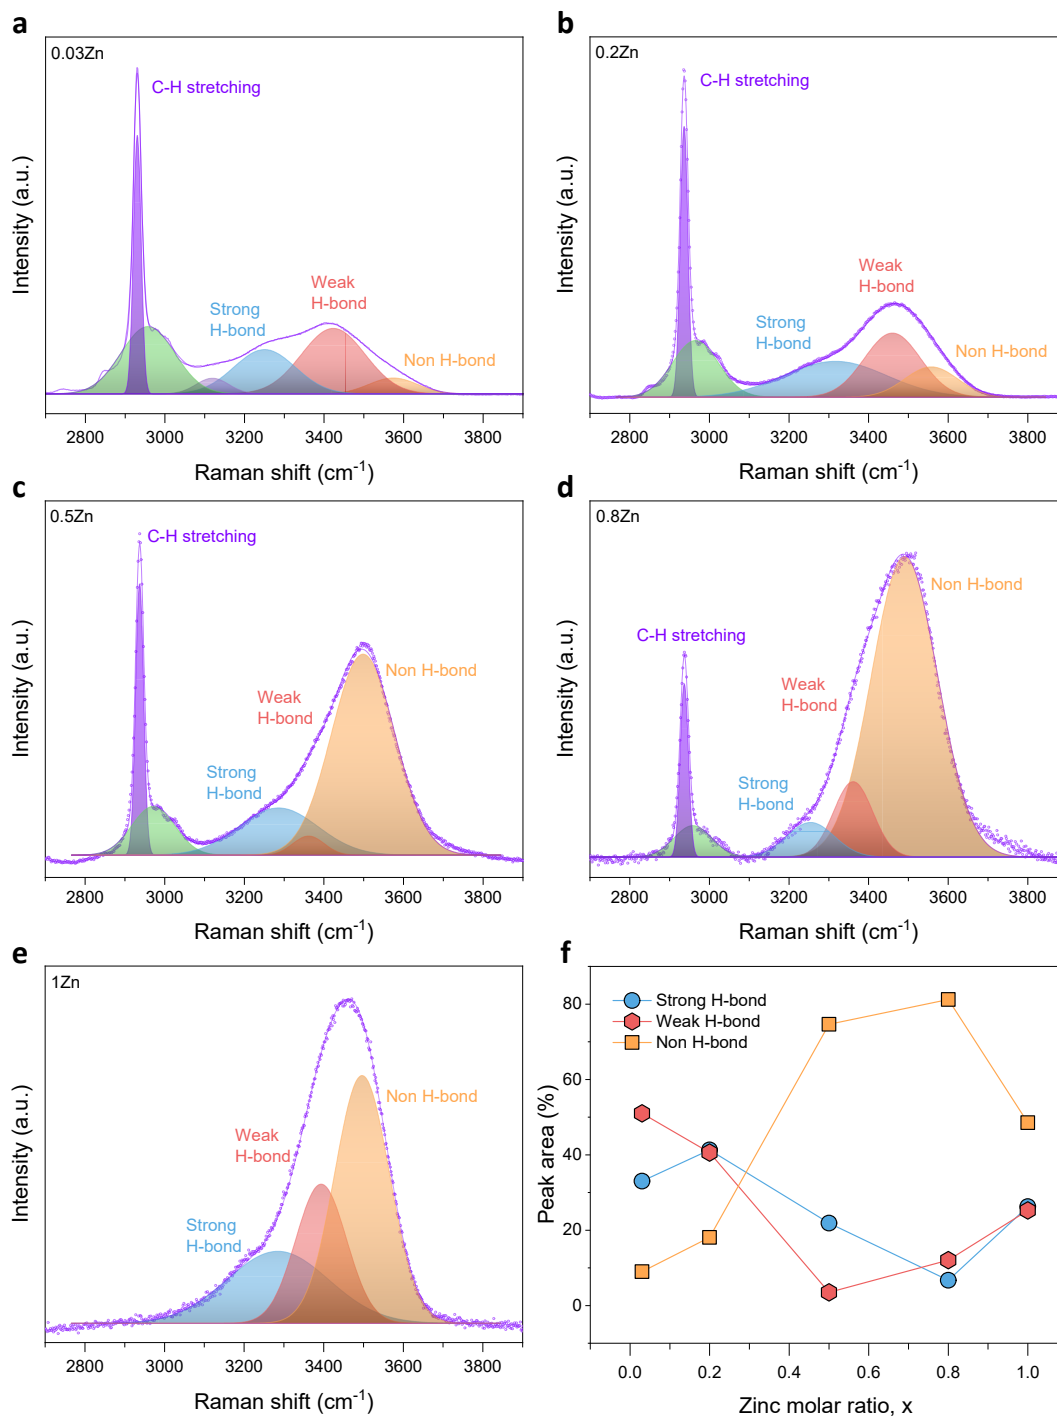

**Figure S2:** (a) Deconvolution of water molecules' O-H stretching Raman spectra of (a) 0.03Zn, (b) 0.2Zn, (c) 0.5Zn, (d) 0.8Zn, and (e) 1Zn WISEs. (f) The corresponding deconvoluted peak areas.

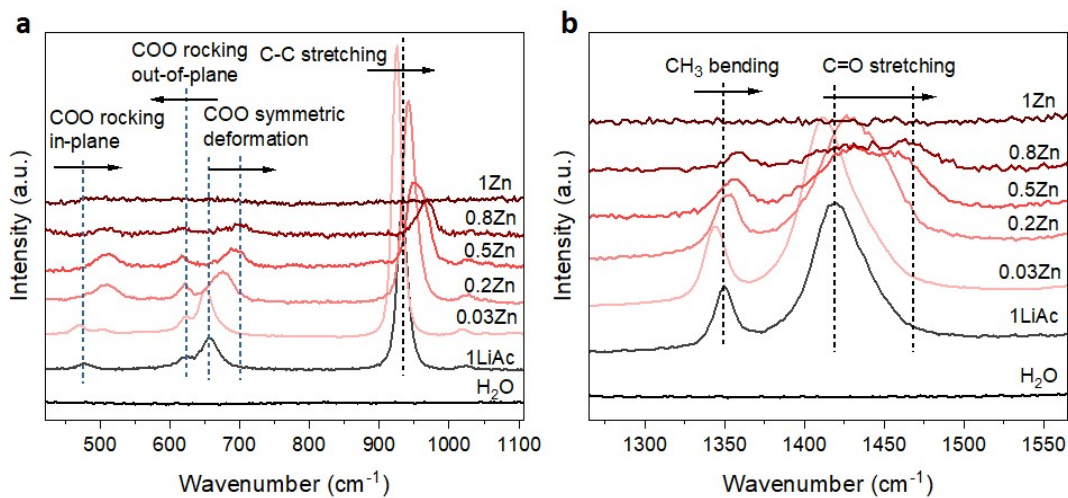

**Figure S3:** Raman spectra of acetate anions in different electrolytes at different region.

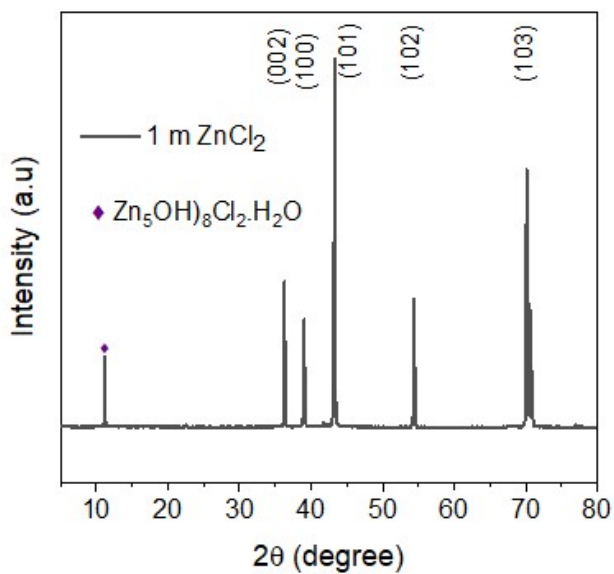

**Figure S4:** XRD patterns of Zn foil immersed in diluted 1 m ZnCl<sub>2</sub> electrolyte for 10 days.

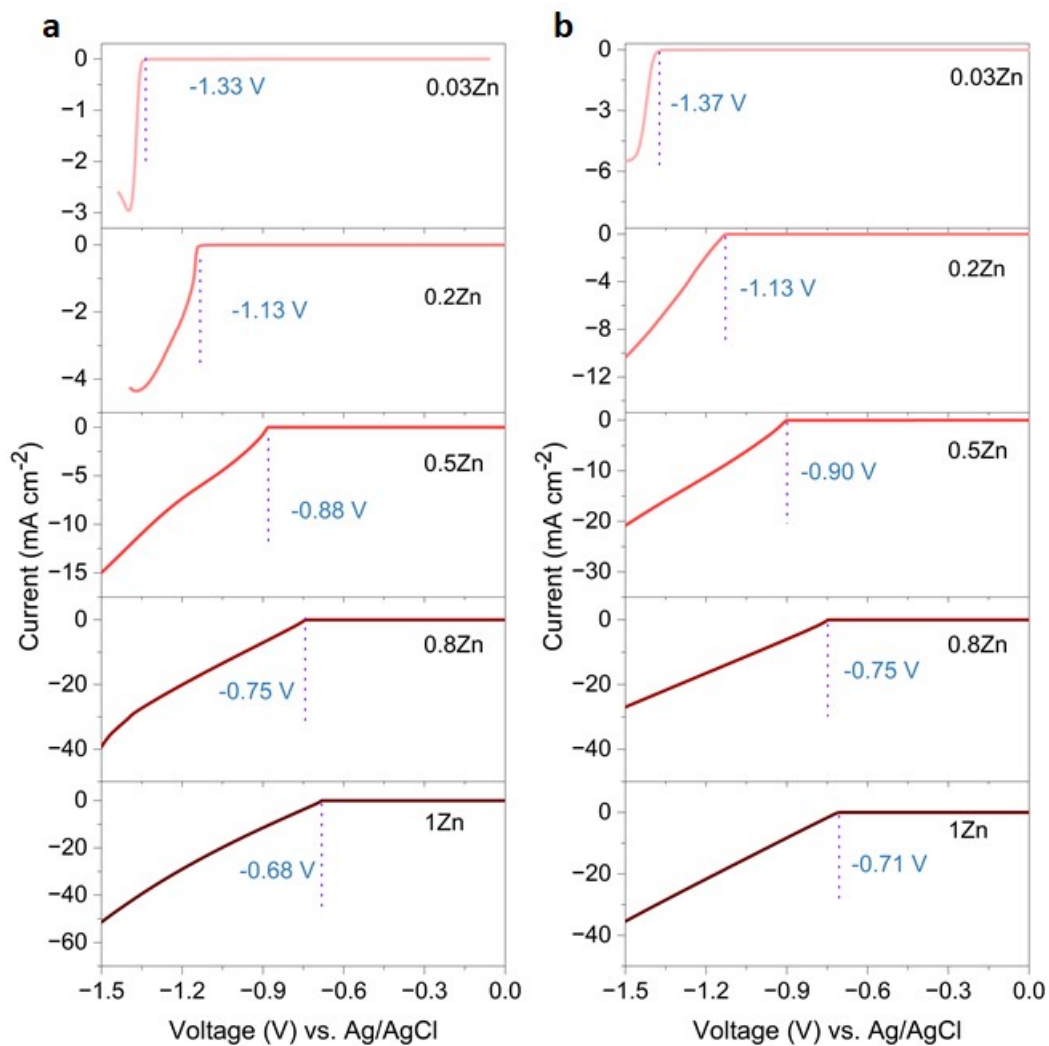

**Figure S5:** LSV profiles of different electrolytes on glassy carbon electrode using three electrode system at a scan rate of (a) 1 mV s<sup>-1</sup> and (b) 10 mV s<sup>-1</sup>.

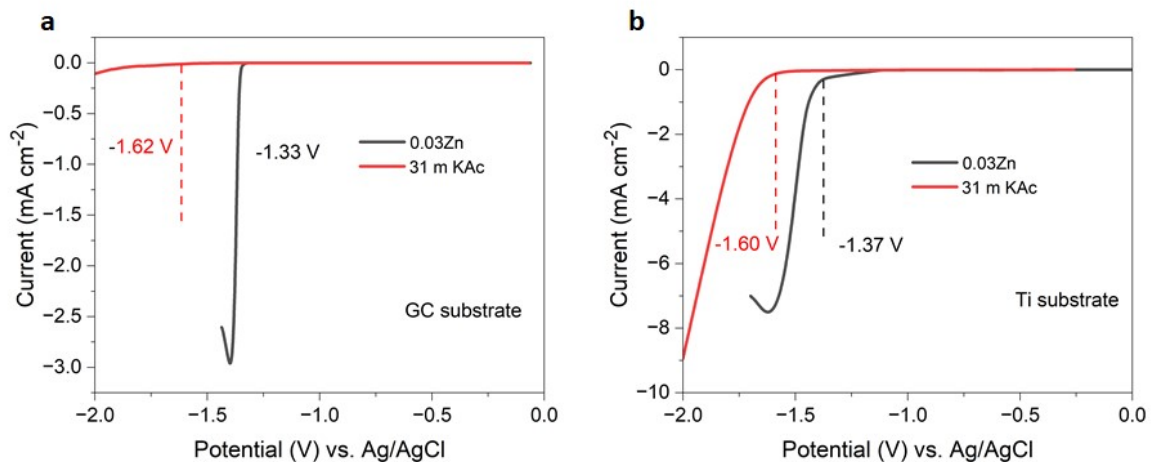

**Figure S6:** LSV profiles of (a) 0.03Zn and 31 m KAc electrolytes on GC substrate at  $1 \text{ mV s}^{-1}$  and (b) 0.03Zn and 31 m KAc electrolyte on Ti substrate at  $10 \text{ mV s}^{-1}$ .

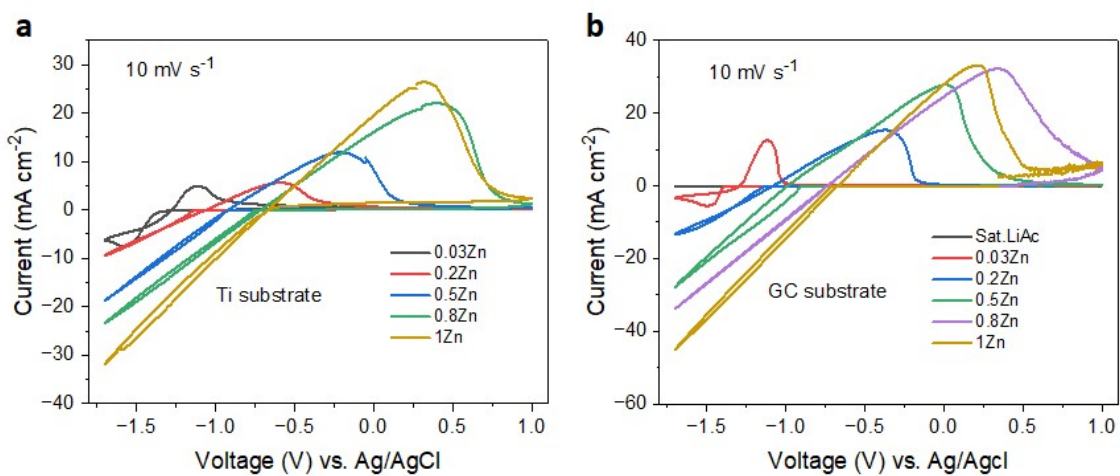

**Fig. S7:** CV profiles in different WISEs at  $10 \text{ mV s}^{-1}$  on (a) Ti substrate and (b) GC substrate



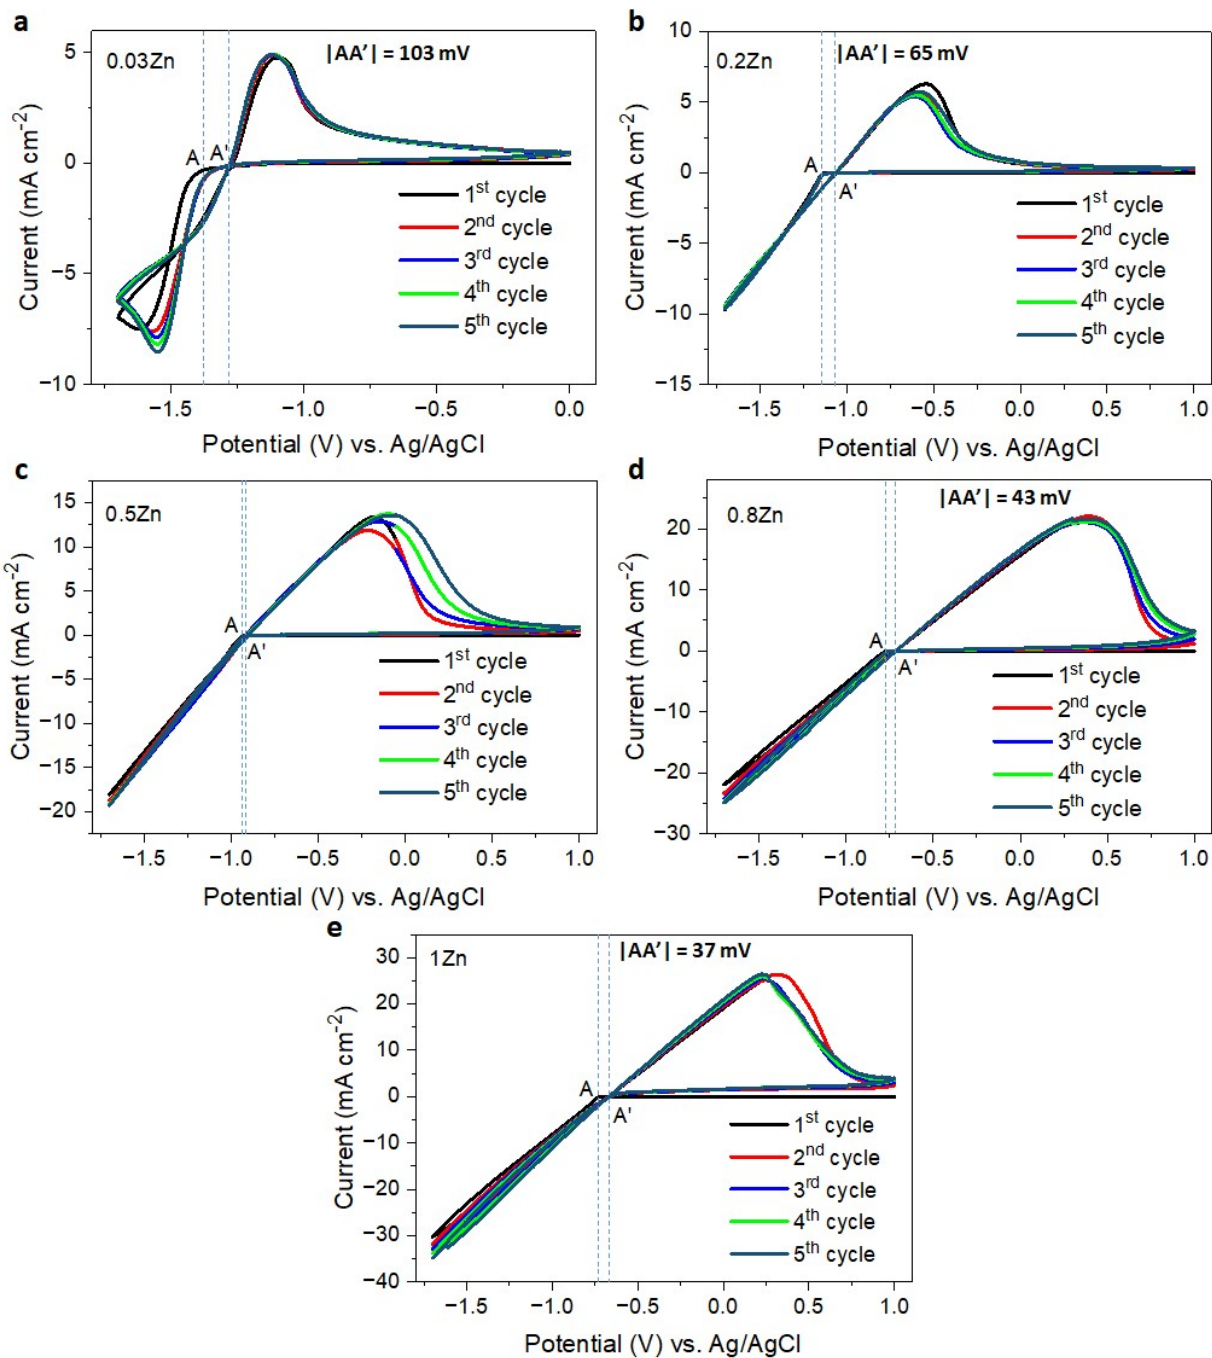

**Figure S8:** Cyclic voltammetry (CV) profiles using three electrode system at  $10 \text{ mV s}^{-1}$  in (a) 0.03, (b) 0.2, (c) 0.5 Zn, (d) 0.8, and (e) 1Zn WISEs.

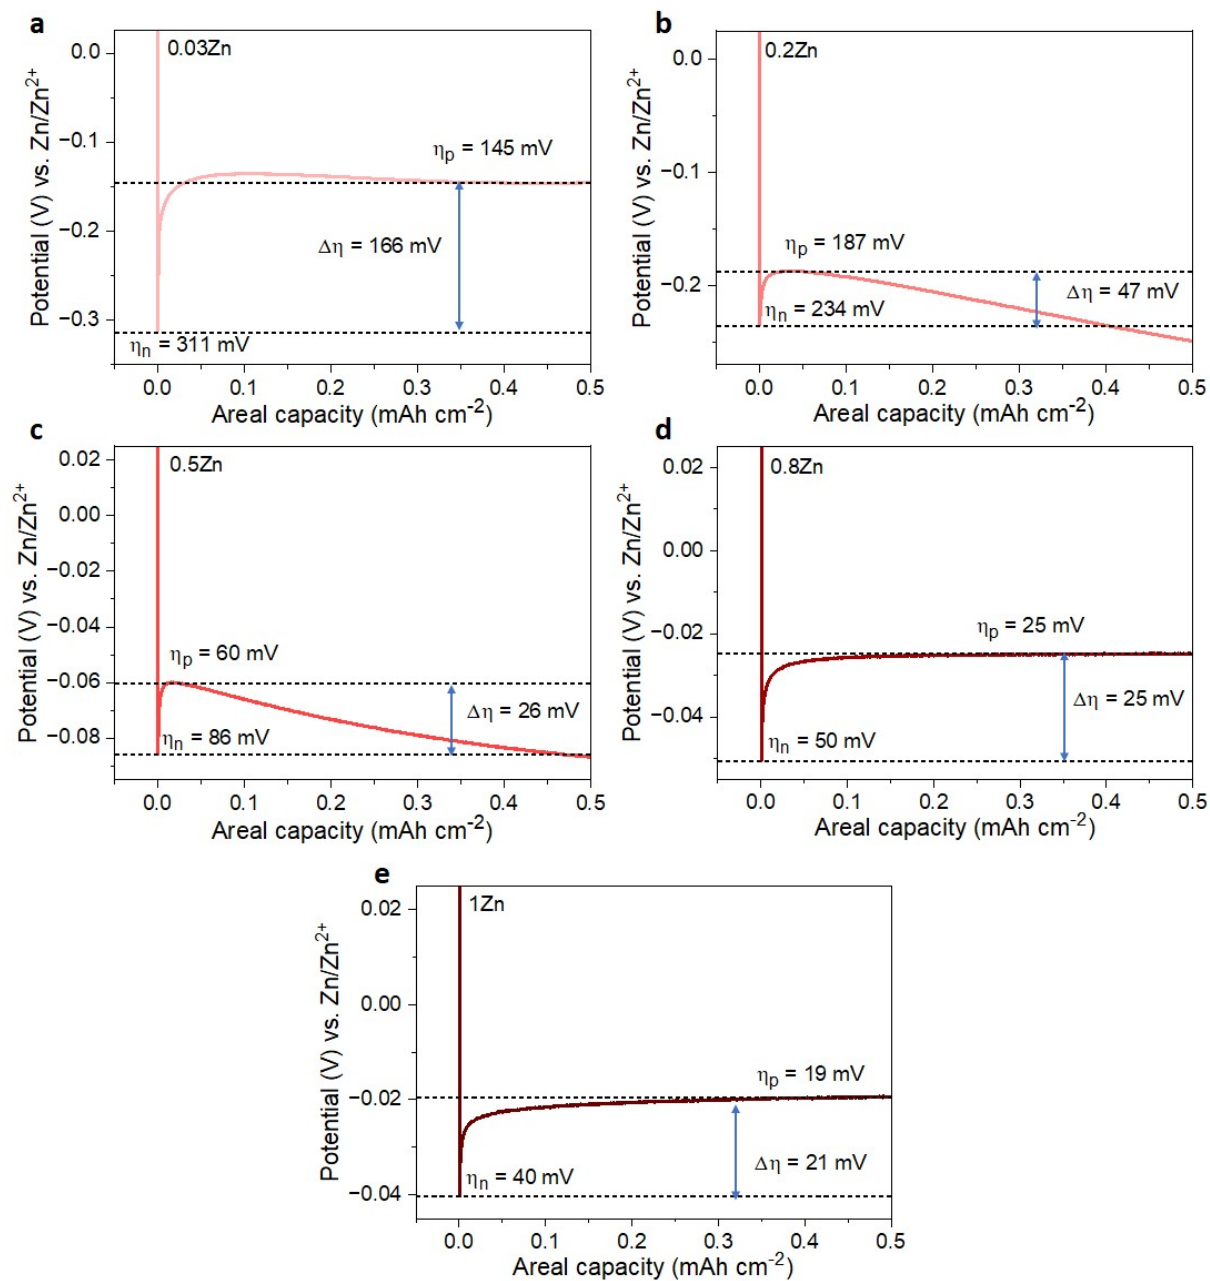

**Figure S9:** Initial Zn nucleation overpotentials of Zn||Ti half cells at 1 mA cm<sup>-2</sup> and 0.5 mAh cm<sup>-2</sup> (a) 0.03, (b) 0.2, (c) 0.5, (d) 0.8, and (e) 1Zn electrolytes.

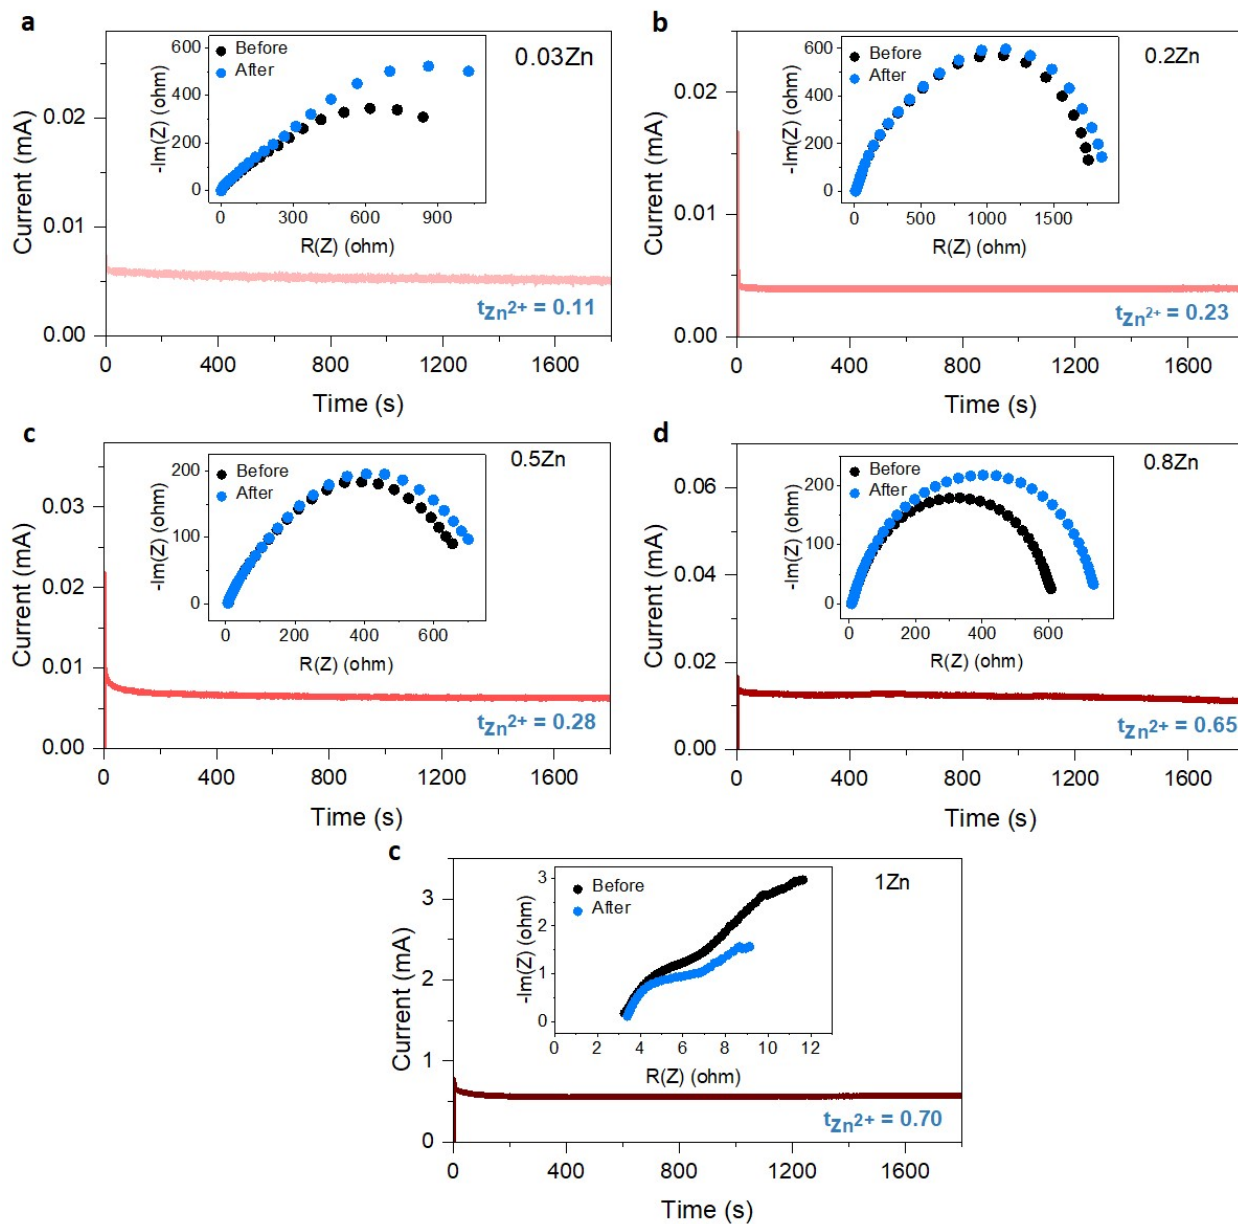

**Figure S10:** Current-time curves of Zn||Zn symmetric cells at polarization potential of 10 mV for 1,800 s using (a) 0.03, (b) 0.2, (c) 0.5, (d) 0.8, and (e) 1Zn electrolytes. Insets are the corresponding EIS graphs before and after polarization.

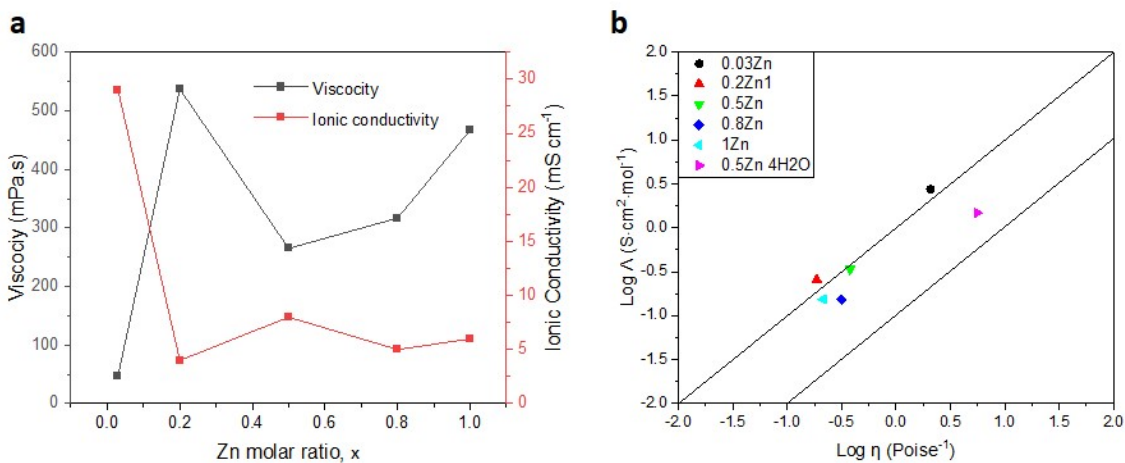

**Figure S11:** (a) Ionic conductivity and viscosity at various Zn molar ratios. (b) Walden plot in the at 25°C.

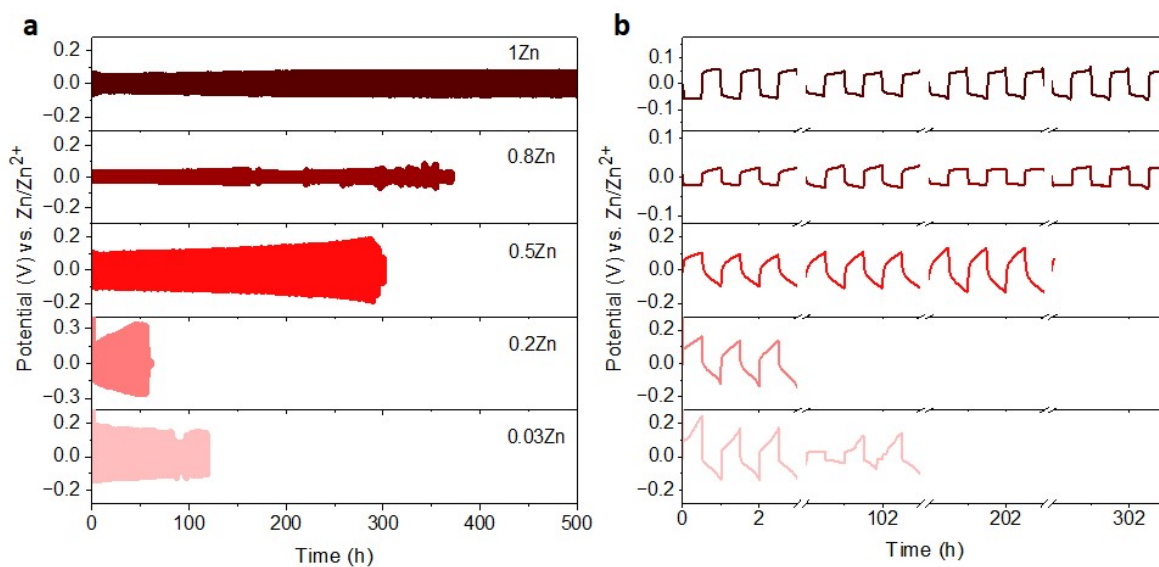

**Figure S12:** (a) Voltage profiles for Zn||Zn cells conducted in 0.03, 0.2, 0.5, 0.8, and 1Zn WISEs at current density of 1 mA cm<sup>-2</sup> with a capacity of 0.5 mAh cm<sup>-2</sup>. (b) the corresponding polarization overpotentials profile

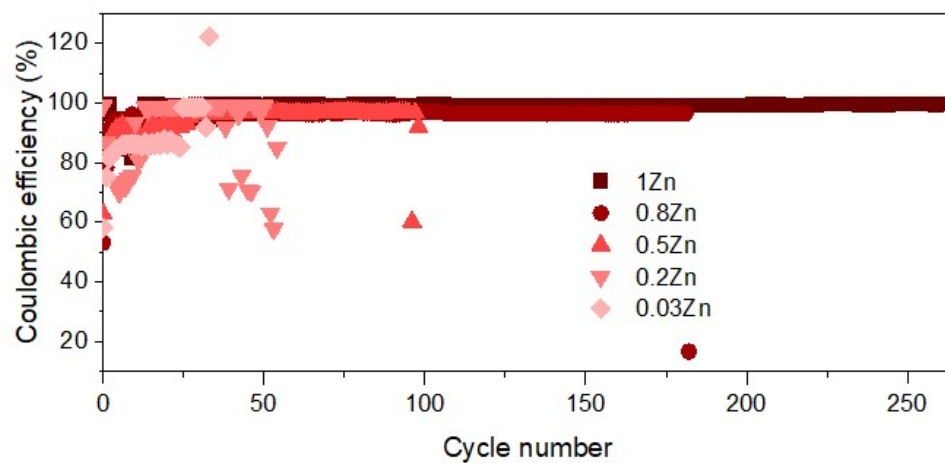

**Figure S13:** CE measurements of Zn||Ti cells using different WISEs at a current density of  $1 \text{ mA cm}^{-2}$  and a capacity of  $0.5 \text{ mAh cm}^{-2}$ .

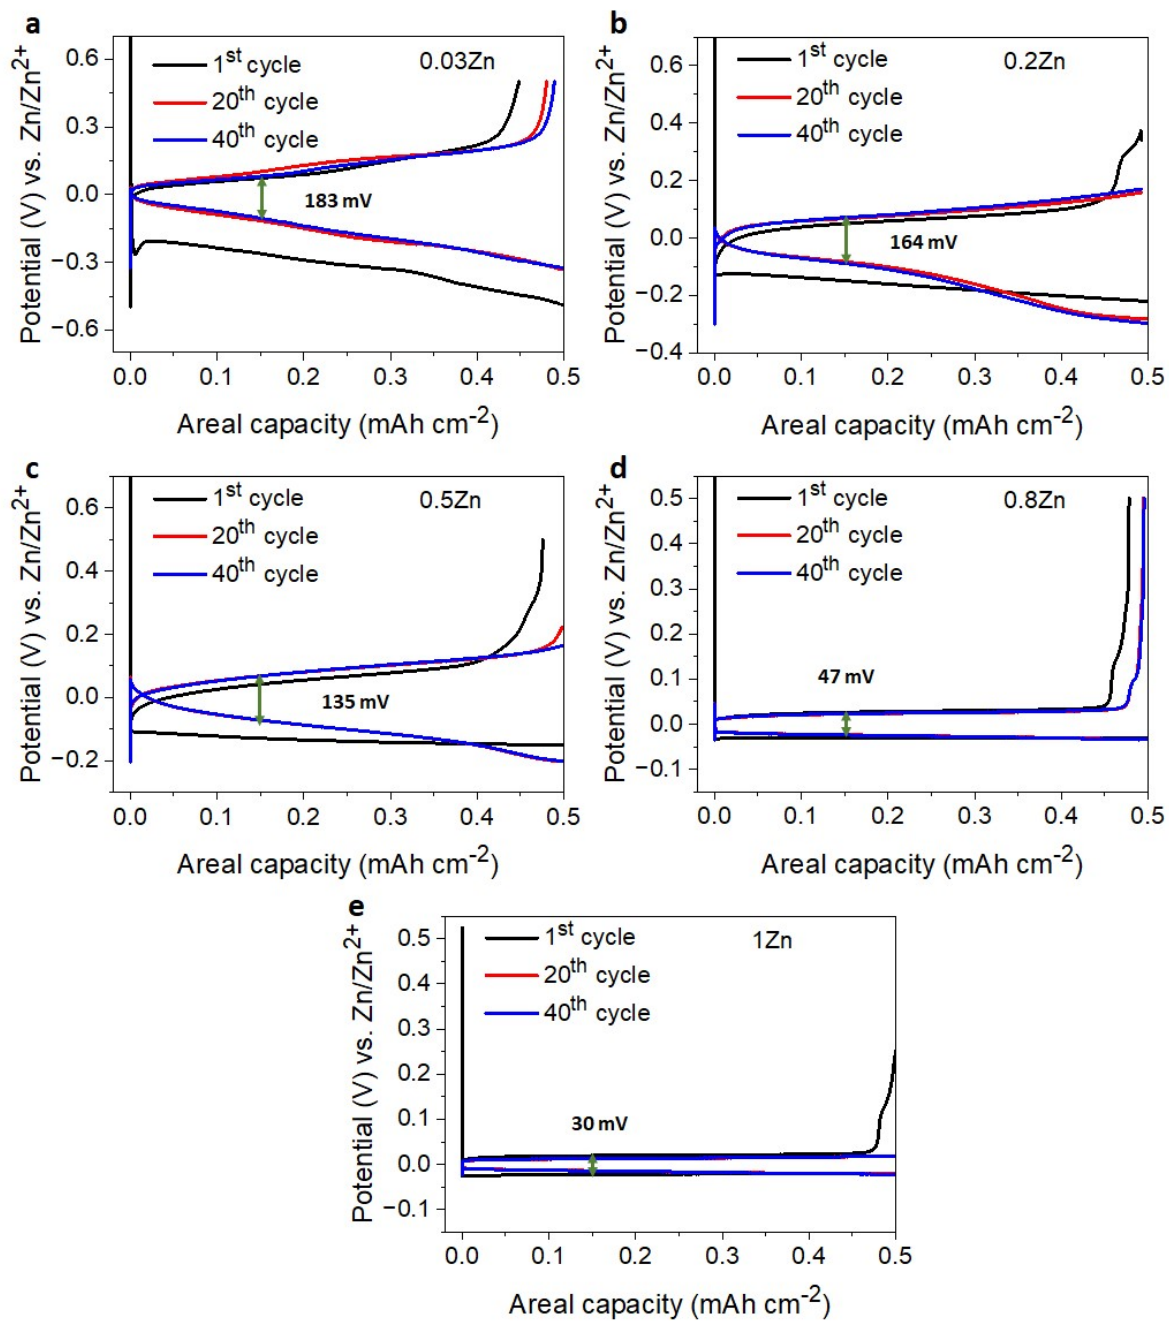

**Figure S14:** Galvanostatic voltage profiles of Zn||Cu cells in (a) 0.03, (b) 0.2, (c) 0.5, (d) 0.8, and (e) 1Zn electrolytes at a current density of 1 mA cm<sup>-2</sup> with a capacity of 0.5 mAh cm<sup>-2</sup>.

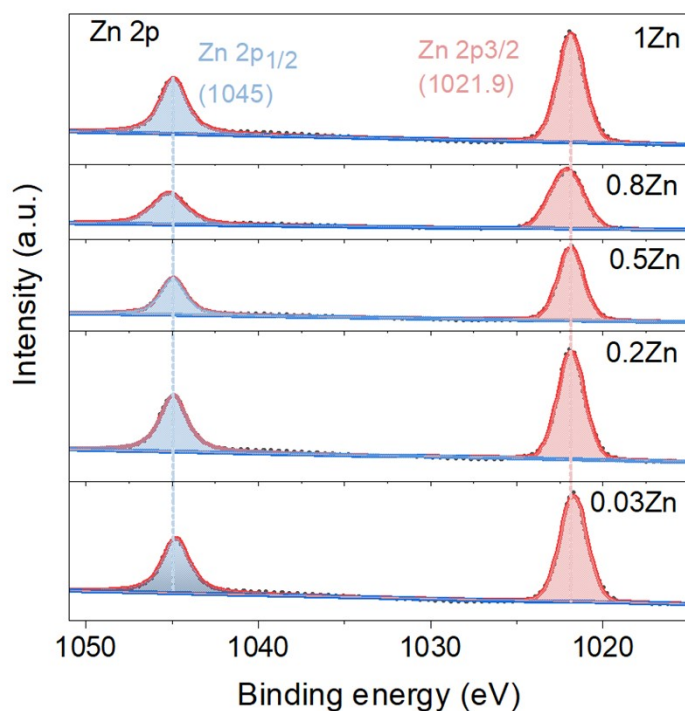

**Figure S15:** Zn 2p XPS spectra of cycled Zn anode surface in 0.03, 0.2, 0.5, 0.8, and 1Zn WISEs at current density 1 mA cm<sup>-2</sup> and a capacity of 0.5 mAh cm<sup>-2</sup> after 20 cycles.

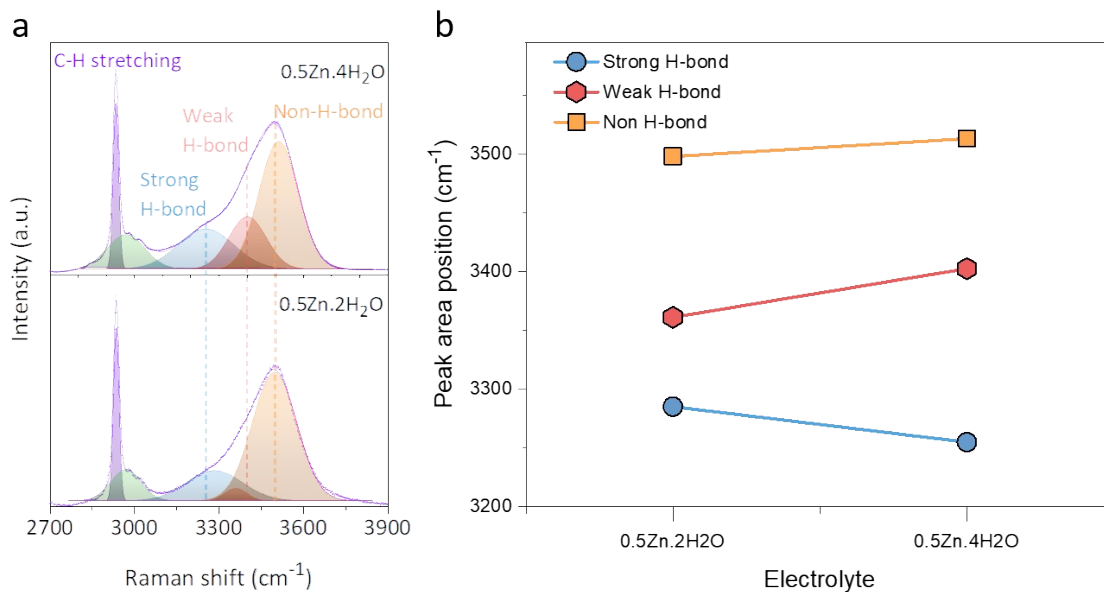

**Figure 16:** (a) Water region Raman spectra of 0.5Zn.4H<sub>2</sub>O and 0.5Zn.2H<sub>2</sub>O electrolytes. (b) The corresponding peak positions.

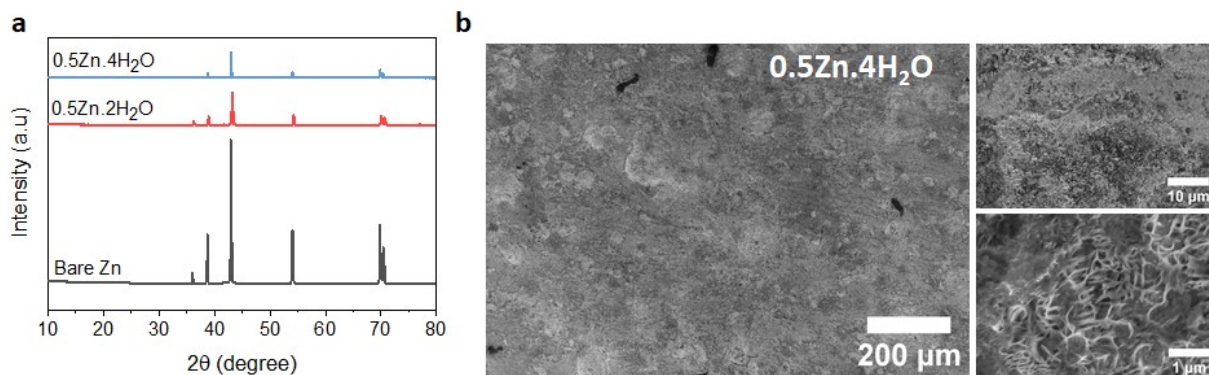

**Figure S17: Soaking measurements of the Zn metal anode in 0.5 Zn.4H<sub>2</sub>O electrolyte for 10 days at room temperature.** (a) XRD patterns of the soaked Zn metal anode. (b) The corresponding SEM images at different magnification.

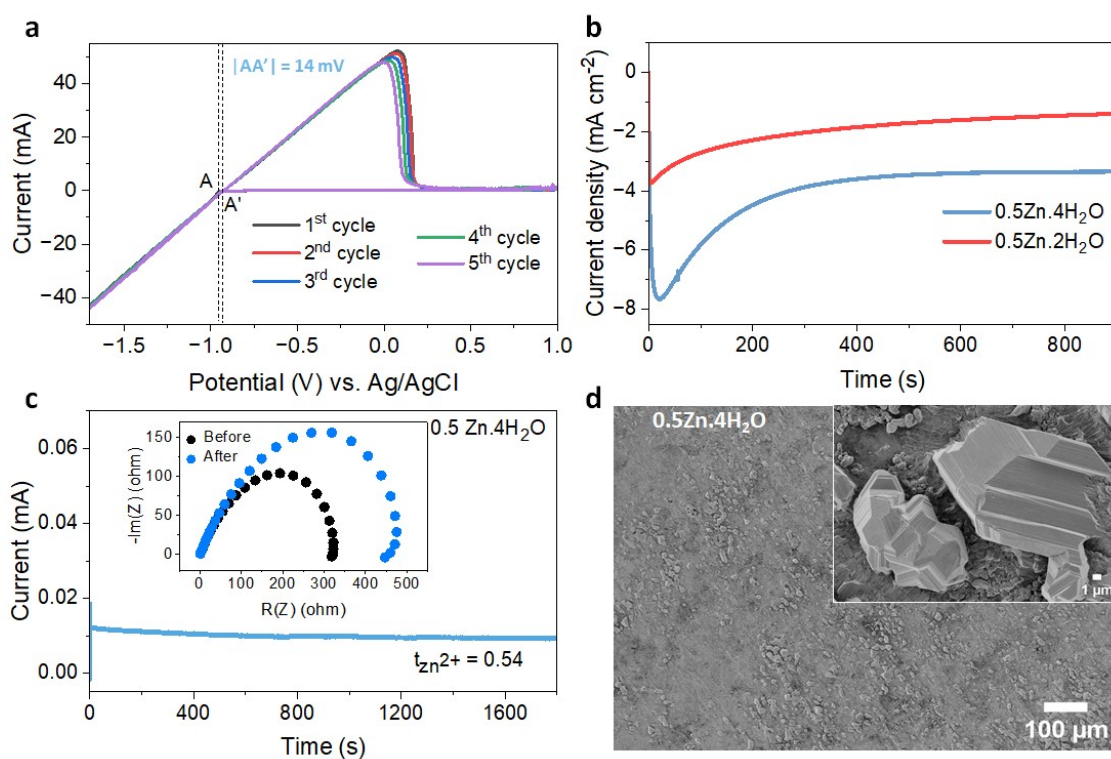

**Figure S18: (a) CV of 0.5Zn.4H<sub>2</sub>O electrolyte using three electrode system at 10 mV s<sup>-1</sup>. (b) CA curves using Zn||Zn symmetric cell at polarization voltage of -150 mV in 0.5Zn.2H<sub>2</sub>O and 0.5Zn.4H<sub>2</sub>O electrolytes. (c) CA curves using Zn||Zn symmetric cell at polarization voltage of 10 mV for 1800 s in 0.5Zn.4H<sub>2</sub>O electrolytes. The Inset is the corresponding EIS graphs before and after polarization. (d) The SEM images of deposited Zn in 0.5Zn.4H<sub>2</sub>O electrolyte on Zn foil substrate.**



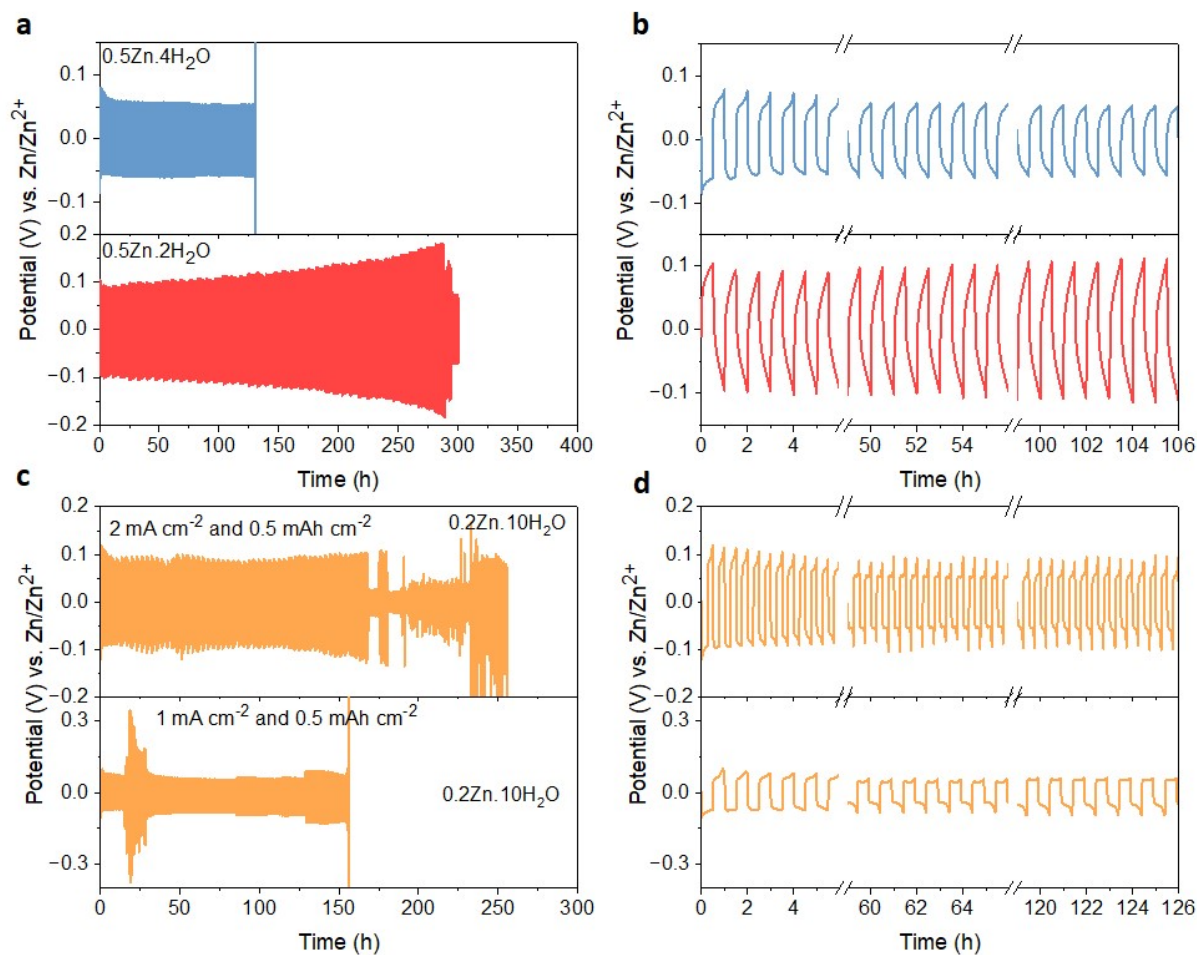

**Figure S19:** Cycling stability of Zn metal anode in (a) 0.5Zn.2H<sub>2</sub>O and 0.5Zn.4H<sub>2</sub>O electrolytes at a current density of 1 mA cm<sup>-2</sup> and with a capacity of 0.5 mAh cm<sup>-2</sup> (b) The corresponding overpotentials profiles. (c) Cycling stability of Zn anode in 0.2Zn.10H<sub>2</sub>O at 1 mA cm<sup>-2</sup> and 2 mA cm<sup>-2</sup> with a capacity of 0.5 mAh cm<sup>-2</sup>. (d) The corresponding overpotentials profiles.

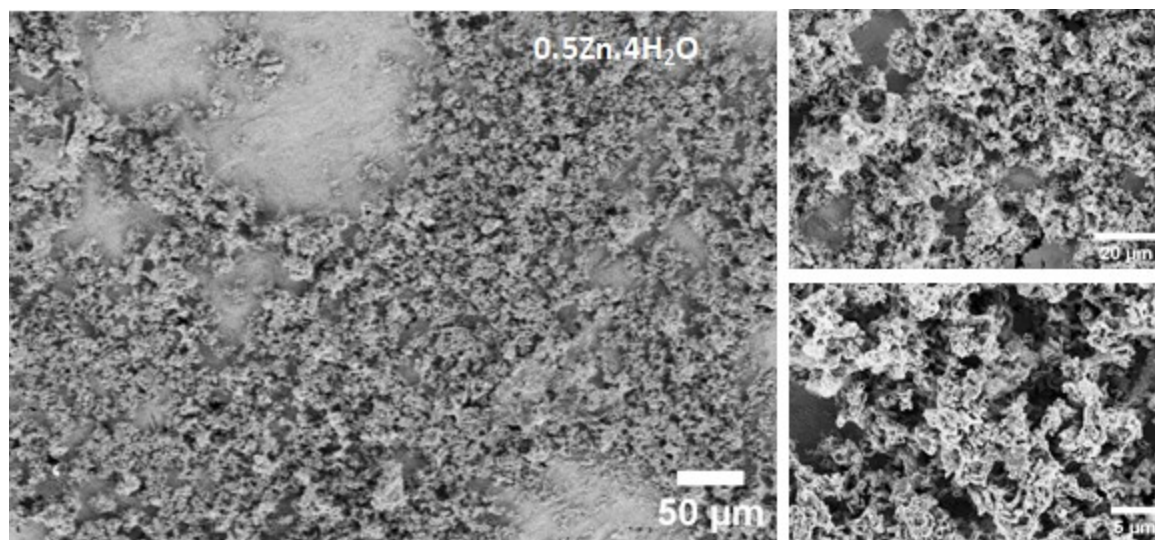

**Figure S20:** XRD and SEM images of Zn electrode in 0.5Zn.4H<sub>2</sub>O after 20 cycles at 1mA cm<sup>-2</sup> and 0.5 mAh cm<sup>-2</sup> after 20 cycles.

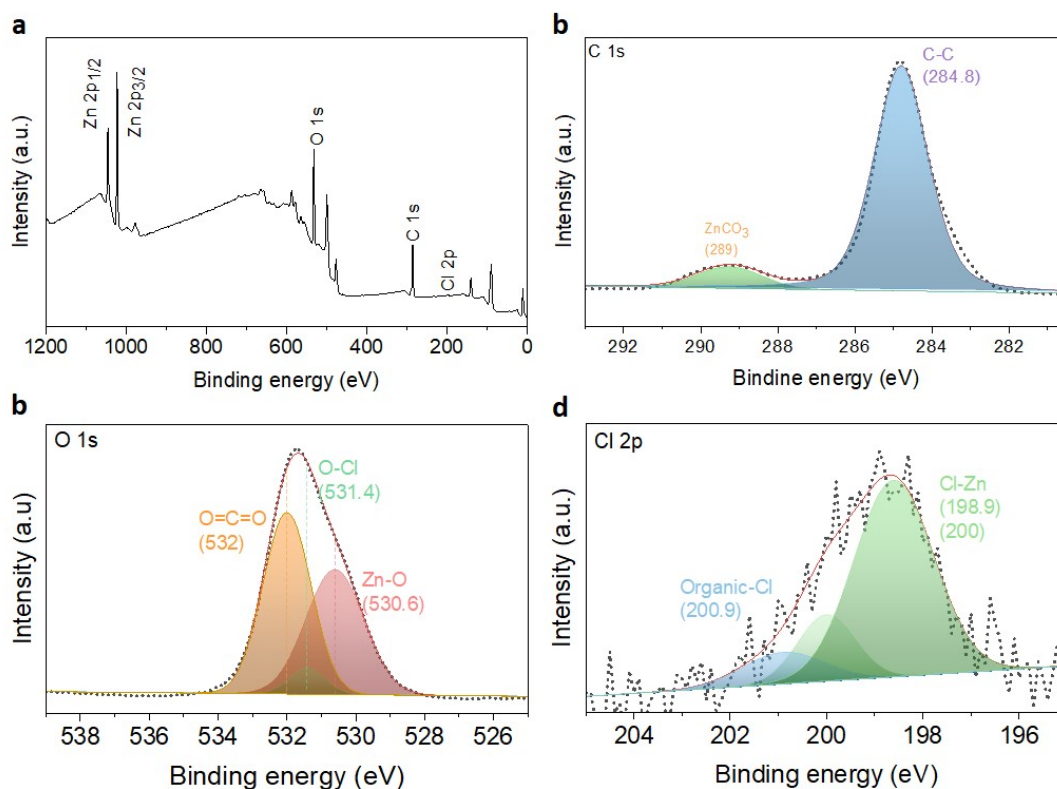

**Figure S21:** XPS spectra of 0.5Zn.4H<sub>2</sub>O electrolytes at a current density of 1 mA cm<sup>-2</sup> with a capacity of 0.5 mAh cm<sup>-2</sup> after 20 cycles. (a) survey spectra, (b) C 1s, (c) O 1s, and (d) Cl 2p.

## References

1. L. Cao, D. Li, T. Pollard, T. Deng, B. Zhang, C. Yang, L. Chen, J. Vatamanu, E. Hu, M. J. Hourwitz, L. Ma, M. Ding, Q. Li, S. Hou, K. Gaskell, J. T. Fourkas, X. Q. Yang, K. Xu, O. Borodin and C. Wang, *Nat. Nanotechnol.*, 2021, **16**, 902-910.
2. D. Han, C. Cui, K. Zhang, Z. Wang, J. Gao, Y. Guo, Z. Zhang, S. Wu, L. Yin, Z. Weng, F. Kang and Q.-H. Yang, *Nat. Sustain.*, 2021, **5**, 205-213.
